# Supplementary material for: The role of colloidal plasmonic nanostructures in organic solar cells
Source: Royal Society of Chemistry journal article supplement (doi:10.1039/c6cp04451d), 2016-01-01
Supplement: c6cp04451d1.pdf [file c6cp04451d1.pdf]

## Supporting Information

### Role of colloidal plasmonic nanostructures in organic solar cells

*C. R. Singh, T. Honold, T.P. Gujar, M. Retsch, A. Fery, M. Karg and M. Thelakkat*

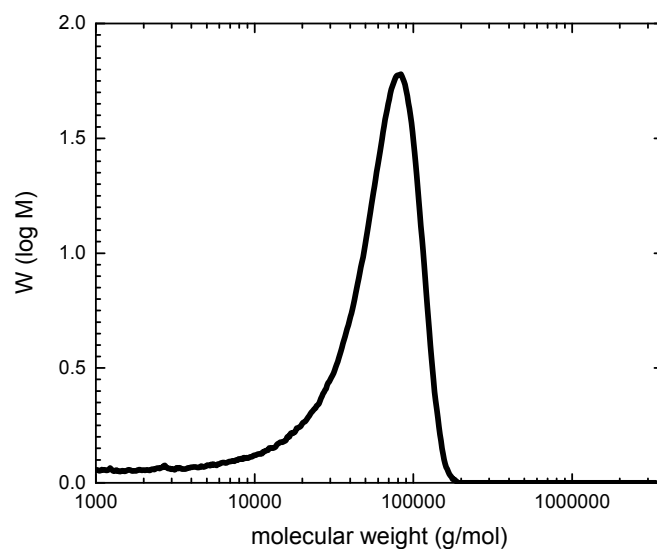

Figure S1. Molecular weight distribution of the linear PNIPAM used during the interface-assisted self-assembly of Au@Au-PNIPAM particles. The molecular weight distribution was obtained using a PS calibration.  $M_n = 46$  kg/mol,  $M_w = 68$  kg/mol, and PDI = 1.48.

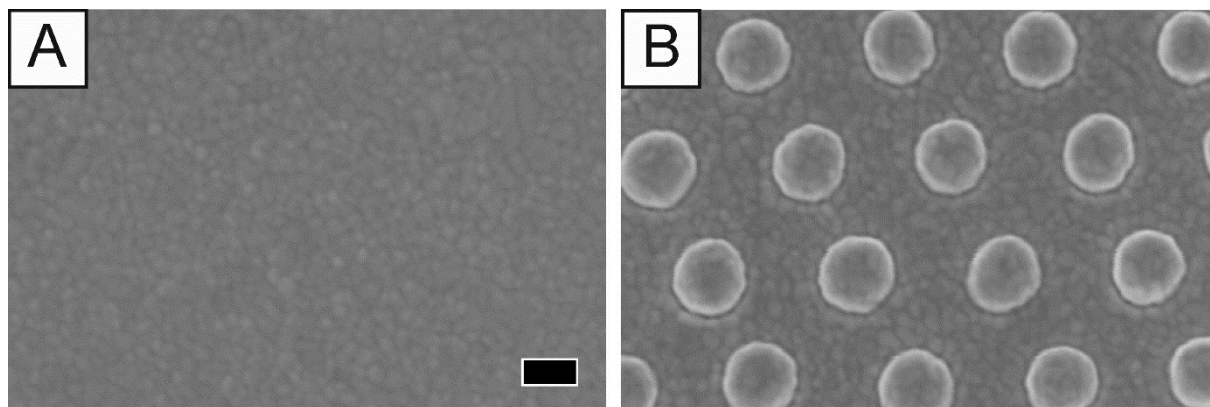

Figure S2. SEM images (top-view) of (A) type 3 and (B) type 4 solar cell devices. The scale bar is 200 nm. Both images have the same magnification.
